# Supplementary material for: Discovery of a potent HMG-CoA reductase degrader that eliminates statin-induced reductase accumulation and lowers cholesterol
Source: PubMed Central journal article supplement (PMC6277434; doi:10.1038/s41467-018-07590-3), 2018-12-03
Supplement: 41467_2018_7590_MOESM3_ESM.pdf [file 41467_2018_7590_MOESM3_ESM.pdf]

## **Description of Additional Supplementary Files**

File Name: Supplementary Data 1

Description: Unprocessed images and raw data underlying the graphs and charts in this paper
